# Supplementary material for: Socioeconomic disparities in Korea by health insurance type during the COVID-19 pandemic: a nationwide study
Source: PubMed Central journal article supplement (PMC8060526; doi:10.4178/epih.e2021007), 2021-01-13
Supplement: epih-43-e2021007-suppl1.pdf [file epih-43-e2021007-suppl1.pdf]

**Supplementary Material 1.** Schema of the Health Insurance Review and Assessment Service data<sup>†</sup>

| <b>Categorization</b>                                                           | <b>Table Name</b>            | <b>Variables Included and their Description</b>                 |
|---------------------------------------------------------------------------------|------------------------------|-----------------------------------------------------------------|
| Subjects who received tests for COVID-19 <sup>‡</sup>                           | Sociodemographic table       | Sex, age, region of residence, medical institution type, others |
|                                                                                 | Healthcare utilization table | Date of visit, duration of hospital stay, expenditure, others   |
|                                                                                 | Diagnosis table              | ICD-10 diagnosis codes, specialty, others                       |
|                                                                                 | Prescription table           | National drug chemical code, day's supply, dosage, others       |
| 3-year medical history of subjects who received tests for COVID-19 <sup>¶</sup> | Sociodemographic table       | Sex, age, region of residence, medical institution type, others |
|                                                                                 | Healthcare utilization table | Date of visit, duration of hospital stay, expenditure, others   |
|                                                                                 | Diagnosis table              | ICD-10 diagnosis codes, specialty, others                       |
|                                                                                 | Prescription table           | National drug chemical code, day's supply, dosage, others       |

**Note:** ICD-10, International Classification of Disease 10<sup>th</sup> Revision

<sup>†</sup>In the nationwide patient Big Data of Health Insurance Review and Assessment Service of Korea, provided as part of the COVID-19 International Research of South Korea, there are eight data tables. For more information, please refer to the “Data Schema” file at <https://hira-covid19.net/>

<sup>‡</sup>Data extraction criteria: COVID-19 related claims with 1) “3/02” in classification code of MT043 (target of medical cost support due to national disaster) based on the serial number of claim statement, 2) “D6584” COVID-19 (real-time polymerase chain reaction), 3) COVID-19 related diagnosis codes (KCD-7: B342, B972, Z208, Z290, U18, U181, Z038, Z115, U071, U072), or 4) other COVID-19 related reimbursement codes (COVID-19 related admission fee, management fee, IUD, isolation, public relief hospital, residential treatment center, screening center, negative pressure room, others)

<sup>¶</sup>Data extraction criteria: healthcare service use claims from January 1, 2017 to May 15, 2020 of patients whose had a claim for the above-mentioned COVID-19 related criteria
