# Supplementary material for: Socioeconomic disparities in Korea by health insurance type during the COVID-19 pandemic: a nationwide study
Source: PubMed Central journal article supplement (PMC8060526; doi:10.4178/epih.e2021007), 2021-01-13
Supplement: epih-43-e2021007-suppl2.pdf [file epih-43-e2021007-suppl2.pdf]

**Supplementary Material 2.** Diagnosis and drug codes used in the study

| Type                                                         | Name                                     | Codes                                                                                                                               |
|--------------------------------------------------------------|------------------------------------------|-------------------------------------------------------------------------------------------------------------------------------------|
| Diagnoses                                                    |                                          |                                                                                                                                     |
|                                                              | COVID-19 (KCD-7)                         | B34.2, B92. 7, Z20.8, Z29.0, U18, U18.1, Z03.8, Z11.5, U07.1, U07.2                                                                 |
| Study Outcomes                                               | Death (ICD-10)                           | Y/N, I46.1, I46.9, R96, R98, R99                                                                                                    |
|                                                              | Intensive care unit (NPC)                | AH190, AH290, AH390, AH110, AH210, AJ001, AJ003, AJ004, AJ005, AJ006, AJ007, AJ008, AJ009, AJ100, AJ200, AJ101, AJ102, AJ201, AJ202 |
|                                                              | Mechanical ventilation (NPC)             | M0850, M0857, M0858, M0860, M5830, M5850, M5857, M5858, M5860, MM360, MM400                                                         |
| Comorbidities (ICD-10)                                       | Hypertension                             | I10-I15                                                                                                                             |
|                                                              | Hyperlipidemia                           | E78                                                                                                                                 |
|                                                              | Diabetes mellitus                        | E10-E14                                                                                                                             |
|                                                              | Asthma                                   | J45, J46                                                                                                                            |
|                                                              | COPD                                     | J40-J44                                                                                                                             |
|                                                              | Atherosclerosis                          | I25                                                                                                                                 |
|                                                              | Heart failure                            | I50                                                                                                                                 |
|                                                              | Myocardial infarction                    | I21                                                                                                                                 |
|                                                              | Stroke                                   | I60-I64                                                                                                                             |
|                                                              | Renal failure                            | N17-N19                                                                                                                             |
|                                                              | Chronic liver disease                    | K70, K71.3-K71.5, K73, K74, K76                                                                                                     |
|                                                              | Fracture                                 | S02 (excl. S02.5), S12, S22, S32, S42, S52, S62, S72, S82, S92, T02, T08, T10, T12, M48.4, M48.5, M84.3                             |
|                                                              | Osteoarthritis                           | M15-M19                                                                                                                             |
|                                                              | Rheumatoid arthritis                     | M05-M06                                                                                                                             |
|                                                              | Psychiatric disorders                    | F04-F10, F20-F99                                                                                                                    |
| Thyroid disorders                                            | E01-E03, E05-E07                         |                                                                                                                                     |
| Osteoporosis                                                 | M80-M82                                  |                                                                                                                                     |
| Dementia                                                     | F00-F03, G30, G31.00, G31.82             |                                                                                                                                     |
| Serious incurable diseases (expanded benefit coverage codes) |                                          | V000-V206                                                                                                                           |
| Drugs (ATC)                                                  |                                          |                                                                                                                                     |
| Co-medications                                               | ACE inhibitors                           | C09A                                                                                                                                |
|                                                              | Angiotensin receptor II blockers         | C09C                                                                                                                                |
|                                                              | $\beta$ -blockers                        | C07                                                                                                                                 |
|                                                              | Calcium channel blockers                 | C08                                                                                                                                 |
|                                                              | Diuretics                                | C03                                                                                                                                 |
|                                                              | Nitrates                                 | C01DA                                                                                                                               |
|                                                              | Antidiabetic medications (incl. insulin) | A10                                                                                                                                 |
|                                                              | Anxiolytics                              | N05B                                                                                                                                |
|                                                              | Antipsychotics                           | N05A                                                                                                                                |
|                                                              | Antidepressants                          | N06A                                                                                                                                |
|                                                              | NSAIDs                                   | M01                                                                                                                                 |
|                                                              | Anticoagulants                           | B01A                                                                                                                                |

**Note:** ACE, angiotensin converting enzyme; ATC, Anatomical Therapeutic Chemical; COPD, chronic obstructive pulmonary disease; KCD-7, Korean Standard Classification of Diseases, 7th Revision; ICD-10, International Classification of Diseases, 10th Revision, NPC, national procedure codes; NSAIDs, nonsteroidal anti-inflammatory drugs
